# Supplementary material for: Overexpression Bombyx mori HEXIM1 Facilitates Immune Escape of Bombyx mori Nucleopolyhedrovirus by Suppressing BmRelish-Driven Immune Responses
Source: MDPI journal article supplement (doi:10.3390/v14122636), 2022-11-25
Supplement: s1 [file s1]

**Supplementary Table S1.** Primers used in this study.

| Primer name    | Primer sequences        |
|----------------|-------------------------|
| qPCR-RpL32-F   | CAGGCGGTTCAAGGGTCAATAC  |
| qPCR-RpL32-R   | TGCTGGGCTCTTTCCACGA     |
| qPCR-HEXIM1- F | TAGAAGATGGCGAACCGACG    |
| qPCR-HEXIM1 -R | GAACGGGGCATGAGTTTTCG    |
| qPCR-SPT5-F    | GGGCGCTGAACCAGAAGAAT    |
| qPCR-SPT5-R    | TGTTCAACCGGTGCCTTTGAT   |
| qPCR-CDK9-F    | GTCGCAAAGTCTGGACAAGC    |
| qPCR-CDK9-R    | CCATGATACATCCGGCTCCC    |
| qPCR-NELF-D-F  | TGTACGATGCACCGGAAACT    |
| qPCR-NELF-D-R  | TCACCACTTTCGCTATTCGGT   |
| qPCR-VP39-F    | ATTGATCGCCAACACCACCT    |
| qPCR-VP39-R    | AGACACCACAAACCCGAACA    |
| qPCR-POLH-F    | GGTGCTACAAGTTCCTCGCT    |
| qPCR-POLH-R    | GTTGGTGTACTCGCTGTGGA    |
| qPCR-P10-F     | AACGGGCTGGAAGAATCGTT    |
| qPCR-P10-R     | GAGCAGTGTCAACCGGTCAAT   |
| qPCR-Lef8-F    | CCACAAGCTTGCCCTTCAAC    |
| qPCR-Lef8-R    | AAATTGTGGACGTTGGTGCG    |
| qPCR-Lef4-F    | TTCCACGATGGCGAACAAGA    |
| qPCR-Lef4-R    | TATTCGAGACGTATGCGGGC    |
| qPCR-Lef9-F    | TCGCCAGTTCAAACGCTAGT    |
| qPCR-Lef9-R    | TGTCTACAAATTGGCCGCCT    |
| qPCR-P47-F     | GTCATGTCCGTGAAACGTGC    |
| qPCR-P47-R     | AACGGGTTCGATTACACGCT    |
| qPCR-KMO-F     | GTTCTTGGTACCGTCACGA     |
| qPCR-KMO-R     | AGTTCGCTTAAATAACGACACAA |
| qPCR-BCAT-F    | GAACGAGCGAGGAAGTGACA    |

---

|               |                       |
|---------------|-----------------------|
| qPCR-BCAT-R   | CAACGGAAGCGAGCACAAAA  |
| qPCR-CecA-F   | TCGCTTGCCCTATGACG     |
| qPCR-CecA-R   | TGAGCCCAGGTGGAAACT    |
| qPCR-CecB-F   | CCTATCCTTCGTCTTCGCTCT |
| qPCR-CecB-R   | TAGCTTTAGCCGAACCAAGG  |
| qPCR-Relish-F | GTCGTTGTTCCGGGCGTCC   |
| qPCR-Relish-R | TCCACACGCGGTGGCCATTC  |
| qPCR-STING-F  | AGCCGTCAACCGTCACTT    |
| qPCR-STING-R  | GAAAACCTACGAATCTGT    |

---
