# Supplementary material for: Overexpression Bombyx mori HEXIM1 Facilitates Immune Escape of Bombyx mori Nucleopolyhedrovirus by Suppressing BmRelish-Driven Immune Responses
Source: Viruses. 2022 Nov 25;14(12):2636. doi: 10.3390/v14122636 (PMC9782744; doi:10.3390/v14122636)
Supplement: Supplementary file 1 [file viruses-14-02636-s001.zip]

Archive with 5 entries (5 files):
- Supplements/Figure S1.pdf
- Supplements/Figure S2.pdf
- Supplements/Figure S3.pdf
- Supplements/Supplementary Figure legend.pdf
- Supplements/Supplementary Table S1.pdf
