# Supplementary figures and images for: Overexpression Bombyx mori HEXIM1 Facilitates Immune Escape of Bombyx mori Nucleopolyhedrovirus by Suppressing BmRelish-Driven Immune Responses
Source: MDPI journal article supplement (doi:10.3390/v14122636), 2022-11-25

Tree scale: 0.1

Colored ranges

- Lepidoptera
- Diptera
- Hymenoptera

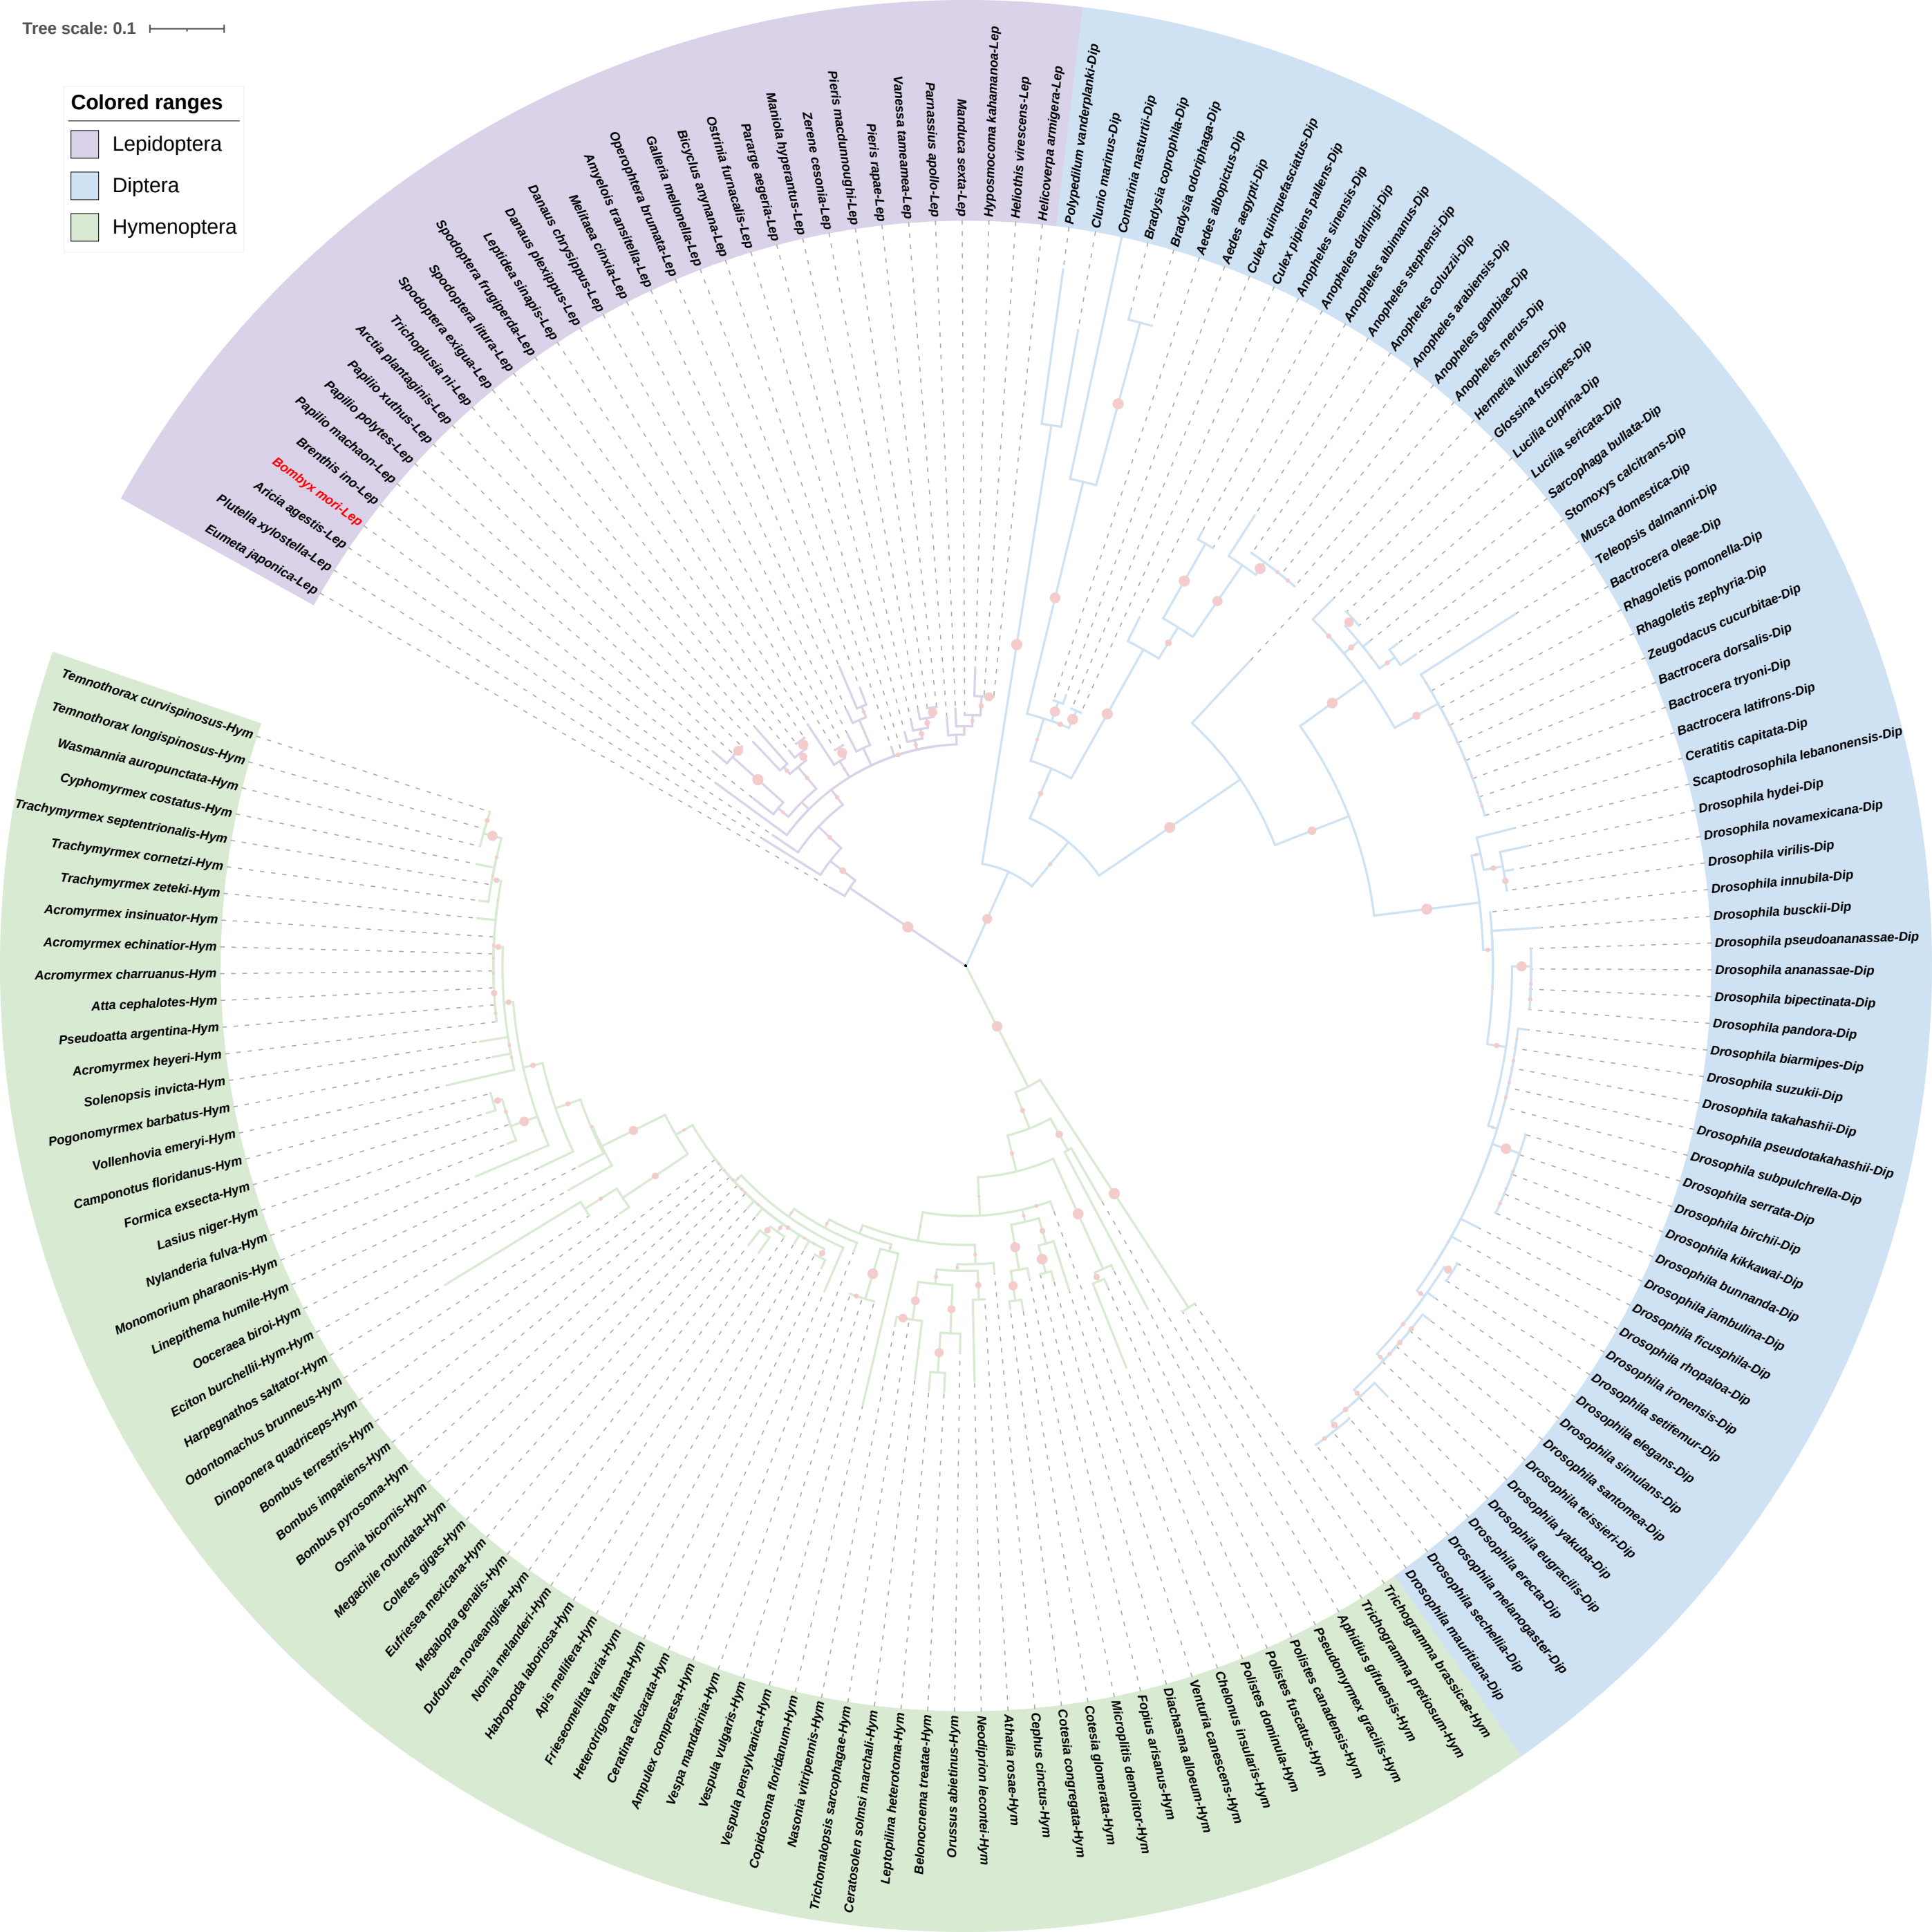

Supplement: s1 [file s1]

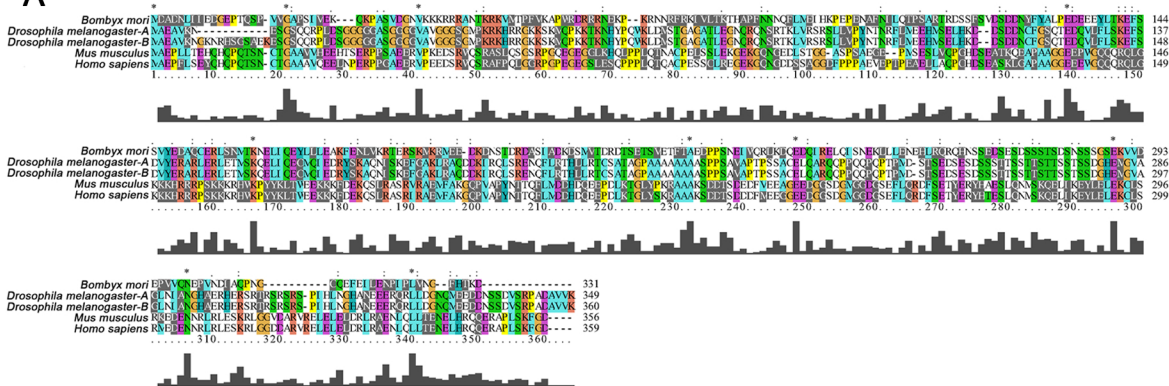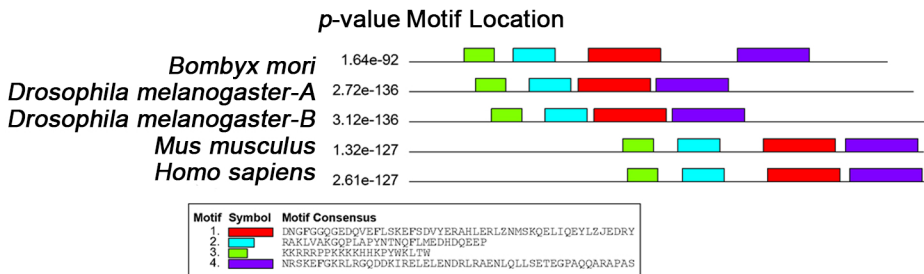

Supplement: s1 [file s1]

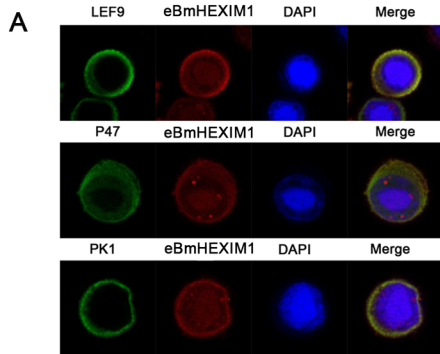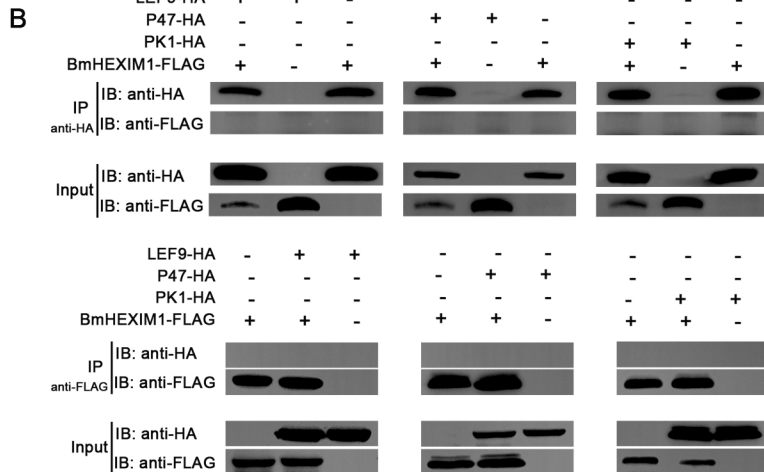

Supplement: s1 [file s1]
